# Supplementary material for: Early detection of the initial stages of LED light-triggered non-alcoholic fatty liver disease by wax physisorption kinetics-Fourier transform infrared imaging
Source: Royal Society of Chemistry journal article supplement (doi:10.1039/d2an01546c), 2022-12-22
Supplement: d2an01546c1.pdf [file d2an01546c1.pdf]

## Supplementary materials

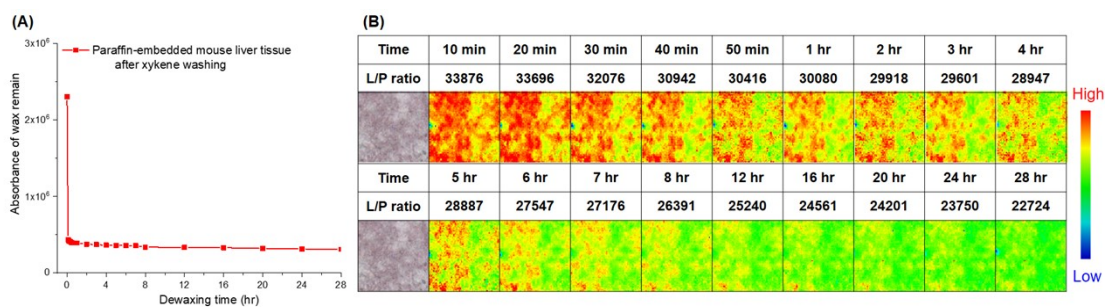

**Supplementary Figure 1.** The temporal change of L/P of Paraffin-embedded tissue section during the xylene immersion. (A) The Kinetic curve of lipid absorbance in the 3000-2800  $\text{cm}^{-1}$  for tissue section during the paraffin desorbing process by using xylene immersion at 56 °C for 28 hrs. (B) The FTIRM spectral images of L/P ratio in a field of view  $170 \times 170 \mu\text{m}^2$ .

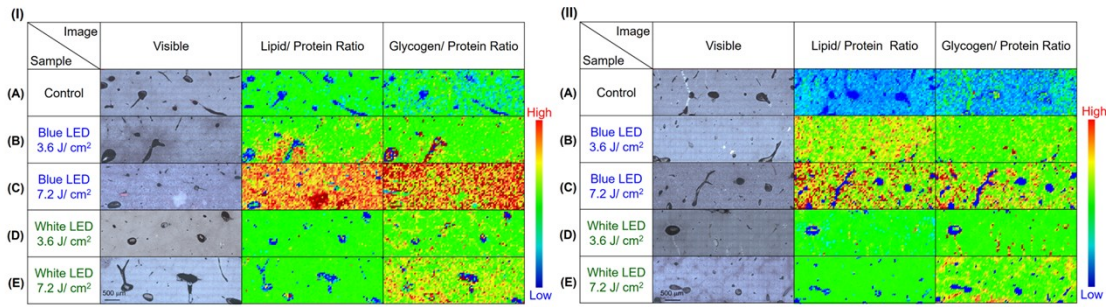

**Supplementary Figure 2.** The SR-FTIRM spectral images of L/P and G/P were presented for the other two groups, the group I and group II, which received different doses of LED illumination.

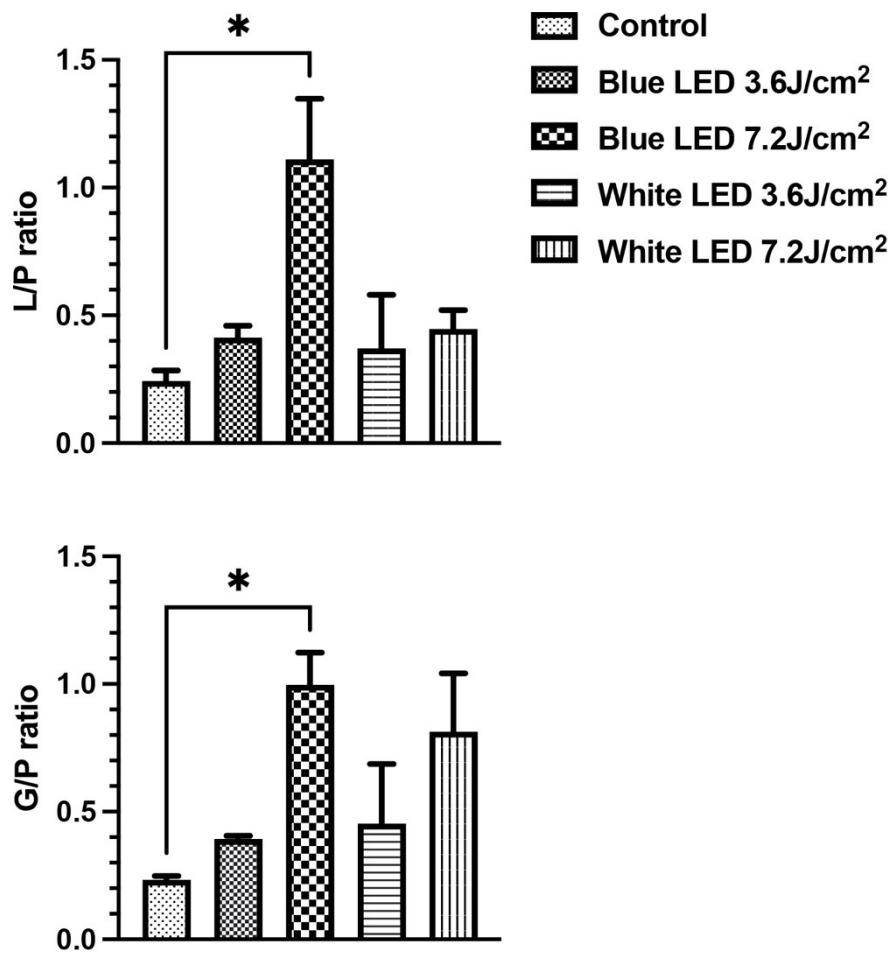

**Supplementary Figure 3.** The statistical result of SR-FTIRM L/P and G/P ratios were presented for the three groups in this study.

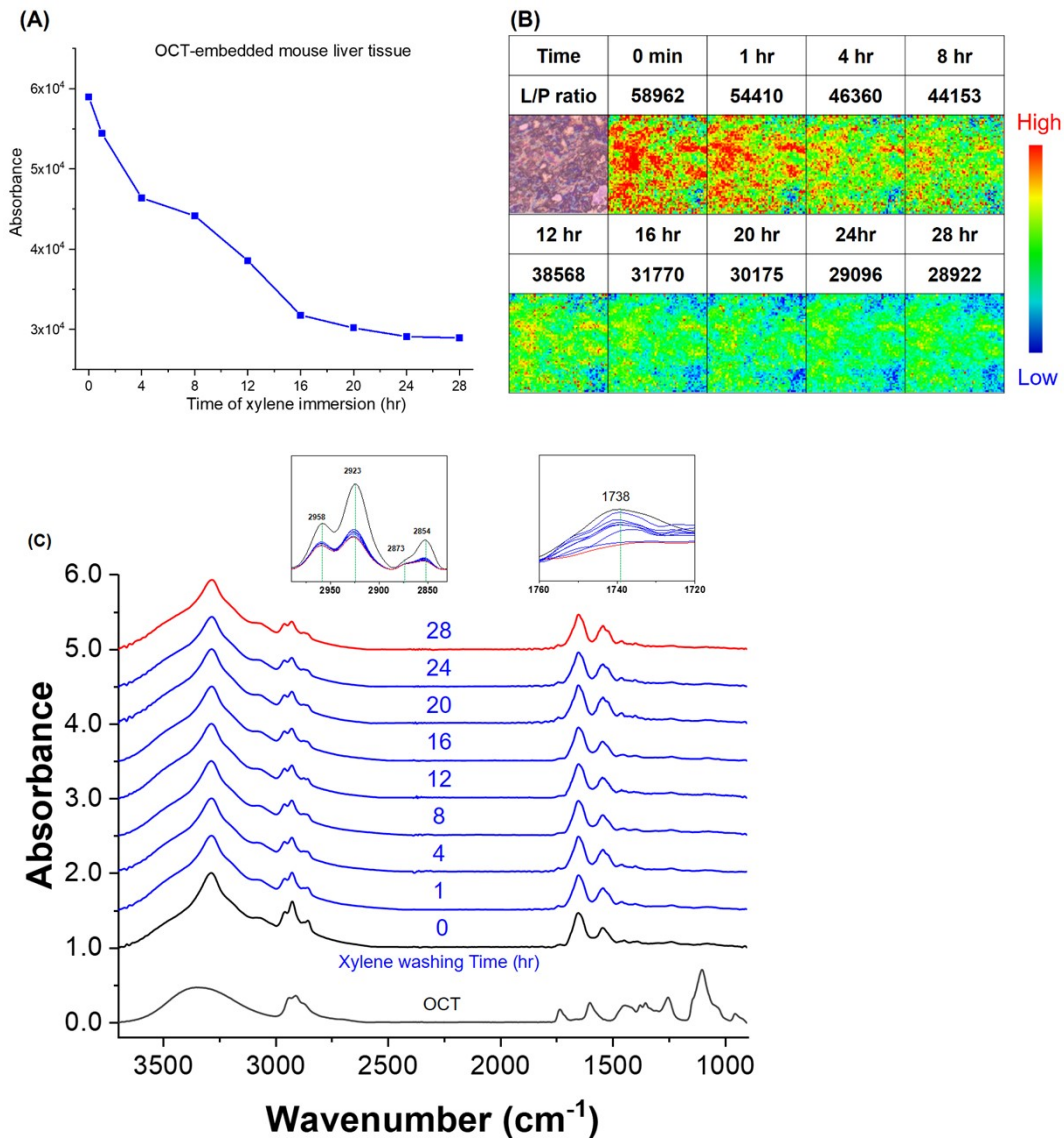

**Supplementary Figure 4.** The spectral change was presented for OCT-embedded tissue section samples during the xylene immersion for 28 hrs. (A) The kinetic curve of lipid absorbance in the 3000-2800 cm<sup>-1</sup> of OCT-embedded tissue section during xylene immersion at 56 °C for 28 hrs after the OCT removal process with ddH<sub>2</sub>O immersion at 28°C for 30 min. (B) The FTIRM spectral images of L/P ratio in a field of view 170 × 170 μm<sup>2</sup>. (C) The temporal spectra of the tissue section sample were presented during the xylene immersion at 56°C, and the FTIR spectrum of the tissue at 0 min was treated by ddH<sub>2</sub>O immersion for 30 min. FTIR spectra were baseline-corrected and normalized at 1650 cm<sup>-1</sup> of Am I band.
